# Supplementary material for: Long-Term Effects of Dietary Supplementation with Olive Oil and Hydrogenated Vegetable Oil on the Rumen Microbiome of Dairy Cows
Source: MDPI journal article supplement (doi:10.3390/microorganisms9061121), 2021-05-22
Supplement: s1 [file s1]

## **Long-term effects of dietary supplementation with olive oil and hydrogenated vegetable oil on the rumen microbiome of dairy cows**

Nathaly Cancino-Padilla<sup>1</sup>, Natalia Catalán<sup>2</sup>, Karen Siu-Ting<sup>3</sup>, Christopher J. Creevey<sup>3</sup>, Sharon A. Huws<sup>3</sup>, Jaime Romero<sup>2</sup> and Einar Vargas-Bello-Pérez<sup>4, 1\*</sup>

<sup>1</sup>Departamento de Ciencias Animales, Facultad de Agronomía e Ingeniería Forestal, Pontificia Universidad Católica de Chile, Avda. Vicuña Mackenna 4860, Santiago 6904411, Chile; nathaly.cancino@gmail.com

<sup>2</sup>Laboratorio de Biotecnología de Alimentos, Unidad de Alimentos, Instituto de Nutrición y Tecnología de los Alimentos (INTA), Universidad de Chile, El Líbano 5524, Macul, Santiago 7830490, Chile; nataliabcatalan@gmail.com

<sup>3</sup>Institute for Global Food Security, School of Biological Sciences, Queen's University of Belfast, 19 Chlorine Gardens, Belfast BT9 5DL, UK; agalychnica@gmail.com (K.S.-T.); chris.creevey@qub.ac.uk (C.J.C.); s.huws@qub.ac.uk (S.A.H.)

<sup>4</sup>Department of Veterinary and Animal Sciences, Faculty of Health and Medical Sciences, University of Copenhagen, Grønnegårdsvej 3, DK-1870 Frederiksberg C, Denmark

\*Correspondence: jromero@inta.uchile.cl (J.R.); evargasb@sund.ku.dk (E.V.-B.-P.)

## Supplementary material

Table S1. Most Prevalent Taxa: Phylum level.

Mean relative abundance (%) at different time point of the most prevalent phylum from cows fed with control, HVO and OO treatments

| Phylum         | Treatments           |                  |                 | SEM <sup>4</sup> | <i>P</i> -value |
|----------------|----------------------|------------------|-----------------|------------------|-----------------|
|                | Control <sup>1</sup> | HVO <sup>2</sup> | OO <sup>3</sup> |                  |                 |
| 21 days        |                      |                  |                 |                  |                 |
| Firmicutes     | 60.16                | 82.75            | 72.83           | 6.54             | 0.10            |
| Bacteroidetes  | 37.84                | 15.03            | 23.78           | 6.64             | 0.10            |
| Actinobacteria | 0.80                 | 0.76             | 2.20            | 0.47             | 0.13            |
| Proteobacteria | 0.29                 | 0.40             | 0.52            | 0.07             | 0.25            |
| Others         | 0.91                 | 1.06             | 0.67            | 0.12             | 0.37            |
| 42 days        |                      |                  |                 |                  |                 |
| Firmicutes     | 65.97                | 74.68            | 64.82           | 3.11             | 0.63            |
| Bacteroidetes  | 31.60                | 22.25            | 32.05           | 3.19             | 0.54            |
| Actinobacteria | 1.02                 | 1.44             | 1.71            | 0.20             | 0.82            |
| Proteobacteria | 0.75                 | 0.99             | 1.03            | 0.09             | 0.56            |
| Others         | 0.66                 | 0.63             | 0.39            | 0.08             | 0.54            |
| 63 days        |                      |                  |                 |                  |                 |
| Firmicutes     | 81.19                | 84.92            | 87.42           | 1.81             | 0.59            |
| Bacteroidetes  | 16.39                | 12.61            | 9.612           | 1.96             | 0.51            |
| Actinobacteria | 1.56                 | 1.15             | 2.19            | 0.30             | 0.35            |
| Proteobacteria | 0.29                 | 0.35             | 0.44            | 0.05             | 0.35            |
| Others         | 0.57                 | 0.97             | 0.34            | 0.18             | 0.07            |

<sup>1</sup>Control, no fat supplement; <sup>2</sup>HVO, supplemented with 3% DM hydrogenated vegetable oil; <sup>3</sup>OO, supplemented with 3% DM olive oil; <sup>4</sup>SEM: standard error of the mean and values are LSM and pooled SEM; <sup>5</sup>Others, less abundant Phylum (relative abundance  $\leq 0.5\%$ ). Data were analyzed by one-way ANOVA and means were compared by Kruskal-Wallis test. Results were declared significant at  $P < 0.05$ .

Table S2. Most Prevalent Taxa: Family level.

Mean relative abundance (%) at different time point of the most prevalent families from cows fed with control, HVO and OO treatments

| Family             | Treatments           |                  |                 | SEM <sup>4</sup> | <i>P</i> -value |
|--------------------|----------------------|------------------|-----------------|------------------|-----------------|
|                    | Control <sup>1</sup> | HVO <sup>2</sup> | OO <sup>3</sup> |                  |                 |
| 21 days            |                      |                  |                 |                  |                 |
| Ruminococcaceae    | 17.42                | 29.60            | 22.84           | 3.52             | 0.06            |
| Lachnospiraceae    | 12.74                | 19.05            | 23.09           | 3.01             | 0.15            |
| Prevotellaceae     | 30.30                | 9.78             | 18.54           | 5.95             | 0.12            |
| Acidaminococcaceae | 16.24                | 18.41            | 10.41           | 2.39             | 0.40            |
| Others             | 23.29                | 23.17            | 25.13           | 0.63             | 0.75            |
| 42 days            |                      |                  |                 |                  |                 |
| Ruminococcaceae    | 17.59                | 21.90            | 16.86           | 1.57             | 0.63            |
| Lachnospiraceae    | 19.05                | 22.35            | 21.39           | 0.98             | 0.84            |
| Prevotellaceae     | 26.80                | 18.15            | 28.66           | 3.24             | 0.54            |
| Acidaminococcaceae | 17.01                | 16.99            | 13.14           | 1.29             | 0.63            |
| Others             | 19.55                | 20.62            | 19.95           | 0.31             | 0.99            |
| 63 days            |                      |                  |                 |                  |                 |
| Ruminococcaceae    | 21.15                | 25.31            | 25.52           | 1.42             | 0.58            |
| Lachnospiraceae    | 29.12                | 23.96            | 35.39           | 3.30             | 0.15            |
| Prevotellaceae     | 12.37                | 8.93             | 7.58            | 1.43             | 0.54            |
| Acidaminococcaceae | 14.70                | 16.88            | 12.69           | 1.21             | 0.71            |
| Others             | 22.67                | 24.92            | 18.82           | 1.78             | 0.05            |

<sup>1</sup>Control, no fat supplement; <sup>2</sup>HVO, supplemented with 3% DM hydrogenated vegetable oil; <sup>3</sup>OO, supplemented with 3% DM olive oil; <sup>4</sup>SEM: standard error of the mean standard error of the mean and values are LSM and pooled SEM. <sup>5</sup>Others' refers to the less abundant Phylum (relative abundance  $\leq 0.5\%$ ). Data were analyzed by one-way ANOVA and means were compared by Kruskal-Wallis test. Results were declared significant at  $P < 0.05$ .

Table S3. Most Prevalent Taxa: Genus level.

Mean relative abundance (%) at different time point of the most prevalent genus from cows fed with control, HVO and OO treatments

| Genus                                | Treatments           |                  |                 | SEM   | P- value |
|--------------------------------------|----------------------|------------------|-----------------|-------|----------|
|                                      | <sup>1</sup> Control | <sup>2</sup> HVO | <sup>3</sup> OO |       |          |
| 21 days                              |                      |                  |                 |       |          |
| <i>Prevotella_1</i>                  | 29.15                | 8.63             | 17.97           | 5.93  | 0.20     |
| <i>Succiniclasticum</i>              | 19.13                | 21.44            | 13.12           | 2.48  | 0.45     |
| <i>Ruminococcaceae_NK4A214_group</i> | 9.16                 | 13.65            | 11.65           | 1.30  | 0.20     |
| <i>Christensenellaceae_R-7_group</i> | 7.83                 | 10.46            | 6.57            | 1.15  | 0.27     |
| <i>Ruminococcaceae_UCG-014</i>       | 5.31                 | 9.26             | 6.19            | 1.20  | 0.25     |
| <i>Lachnospiraceae_NK3A20_group</i>  | 3.03                 | 4.86             | 6.12            | 0.89  | 0.33     |
| Others                               | 0.262                | 0.315            | 0.382           | 0.035 | 0.001    |
| 42 days                              |                      |                  |                 |       |          |
| <i>Prevotella_1</i>                  | 24.95                | 16.28            | 27.10           | 3.31  | 0.54     |
| <i>Succiniclasticum</i>              | 21.07                | 20.87            | 16.23           | 1.58  | 0.54     |
| <i>Ruminococcaceae_NK4A214_group</i> | 7.89                 | 10.11            | 8.28            | 0.69  | 0.77     |
| <i>Christensenellaceae_R-7_group</i> | 7.25                 | 8.00             | 4.95            | 0.92  | 0.71     |
| <i>Ruminococcaceae_UCG-014</i>       | 4.08                 | 8.55             | 4.30            | 1.46  | 0.45     |
| <i>Lachnospiraceae_NK3A20_group</i>  | 4.61                 | 6.28             | 5.25            | 0.49  | 0.91     |
| Others                               | 0.298                | 0.298            | 0.338           | 0.013 | 0.82     |
| 63 days                              |                      |                  |                 |       |          |
| <i>Prevotella_1</i>                  | 12.09                | 8.42             | 6.99            | 1.52  | 0.54     |
| <i>Succiniclasticum</i>              | 18.74                | 21.09            | 17.14           | 1.15  | 0.59     |
| <i>Ruminococcaceae_NK4A214_group</i> | 11.35                | 12.04            | 15.74           | 1.36  | 0.51     |
| <i>Christensenellaceae_R-7_group</i> | 10.95                | 12.12            | 6.43            | 1.73  | 0.09     |
| <i>Ruminococcaceae_UCG-014</i>       | 4.66                 | 4.75             | 5.41            | 0.24  | 0.91     |
| <i>Lachnospiraceae_NK3A20_group</i>  | 7.82                 | 6.25             | 11.56           | 1.58  | 0.23     |
| Others                               | 0.343                | 0.350            | 0.364           | 0.006 | 0.63     |

<sup>1</sup>Control, no fat supplement; <sup>2</sup>HVO, supplemented with 3% DM hydrogenated vegetable oil; <sup>3</sup>OO, supplemented with 3% DM olive oil; <sup>4</sup>SEM: standard error of the mean standard error of the mean and values are LSM and pooled SEM. <sup>5</sup>Others' refers to the less abundant Phylum (relative abundance  $\leq 0.5\%$ ). Data were analyzed by one-way ANOVA and means were compared by Kruskal-Wallis test. Results were declared significant at  $P < 0.05$ .

Table S4. PERMANOVA (Weighted) results.

PERMANOVA (Weighted) analysis of the effect of dietary treatments on rumen bacterial diversity

| Treatment       | Period  | SumsOfSqs | MeanSqs | F.Model | R2    | Pr(>F) |
|-----------------|---------|-----------|---------|---------|-------|--------|
| Control vs. HVO | 21 days | 0.063     | 0.063   | 2.812   | 0.319 | 0.052  |
| Control vs. HVO | 42 days | 0.023     | 0.023   | 0.450   | 0.069 | 0.760  |
| Control vs. HVO | 63 days | 0.006     | 0.006   | 0.598   | 0.091 | 0.658  |
| Control vs. OO  | 21 days | 0.022     | 0.022   | 1.717   | 0.222 | 0.229  |
| Control vs. OO  | 42 days | 0.017     | 0.018   | 1.247   | 0.172 | 0.320  |
| Control vs. OO  | 63 days | 0.015     | 0.015   | 1.505   | 0.200 | 0.255  |

SumOfSqs, sum of squares; MeanSqs, mean sum of squares; F, F value by permutation; Statistical significance was declared at  $P < 0.05$ ; P-value based on 999 permutations.

Table S5. PERMANOVA (Weighted) results.

PERMANOVA (UnWeighted) analysis of the effect of dietary treatments on rumen bacterial diversity

| Treatment       | Period  | SumsOfSqs | MeanSqs | F.Model | R2    | Pr(>F) |
|-----------------|---------|-----------|---------|---------|-------|--------|
| Control vs. HVO | 21 days | 0.248     | 0.248   | 1.341   | 0.183 | 0.049  |
| Control vs. HVO | 42 days | 0.216     | 0.216   | 0.937   | 0.135 | 0.492  |
| Control vs. HVO | 63 days | 0.167     | 0.167   | 0.867   | 0.126 | 0.548  |
| Control vs. OO  | 21 days | 0.264     | 0.264   | 1.507   | 0.200 | 0.062  |
| Control vs. OO  | 42 days | 0.252     | 0.252   | 1.439   | 0.193 | 0.062  |
| Control vs. OO  | 63 days | 0.214     | 0.214   | 1.188   | 0.165 | 0.223  |

SumOfSqs, sum of squares; MeanSqs, mean sum of squares; F, F value by permutation; Statistical significance was declared at  $P < 0.05$ ; P-value based on 999 permutations

Table S6. Predicted Functions in Control Diet.

Predicted functions with significant variations in control diet

| Predicted functions                   | <i>P</i> - value |         |         |
|---------------------------------------|------------------|---------|---------|
|                                       | 21 days          | 42 days | 63 days |
| ABC transporters                      | 0.81             | 0.99    | < 0.01  |
| DNA repair and recombination proteins | < 0.01           | 0.99    | < 0.01  |
| Pores ion channels                    | 0.74             | 0.25    | < 0.01  |
| Protein kinases                       | 0.24             | 0.04    | 0.39    |
| Purine metabolism                     | 0.01             | 0.97    | 0.12    |
| Pyrimidine metabolism                 | 0.04             | 0.83    | 0.99    |
| Ribosome                              | 0.03             | 0.77    | 0.73    |
| Transcription factors                 | 0.96             | 0.88    | < 0.01  |
| Transporters                          | 0.99             | 0.46    | < 0.01  |
| Two-component system                  | < 0.01           | < 0.01  | < 0.01  |

Data were analyzed by multiple group ANOVA and Dunnett's multiple comparisons test. Results were declared significant at  $P < 0.01$ .

Table S7. Predicted Functions in OO Diet.

Predicted functions with significant variations in olive oil diet

| Predicted functions                         | <i>P</i> - value |         |         |
|---------------------------------------------|------------------|---------|---------|
|                                             | 21 days          | 42 days | 63 days |
| ABC transporters                            | 0.93             | < 0.01  | 0.86    |
| Alanine, aspartate and glutamate metabolism | 0.99             | 0.01    | 0.21    |
| Amino acid related enzymes                  | 0.92             | < 0.01  | 0.05    |
| Amino sugar and nucleotide sugar metabolism | 0.99             | < 0.01  | 0.25    |
| Aminoacyl-tRNA biosynthesis                 | 0.88             | 0.01    | 0.29    |
| Arginine and proline metabolism             | 0.98             | 0.02    | 0.28    |
| Bacterial motility proteins                 | 0.97             | 0.01    | 0.35    |
| Carbon fixation pathways in prokaryotes     | > 0.99           | 0.04    | 0.34    |
| Chaperones and folding catalysts            | 0.99             | 0.02    | 0.15    |
| Chromosome                                  | 0.79             | < 0.01  | 0.22    |
| DNA repair and recombination proteins       | 0.34             | < 0.01  | 0.02    |
| General function prediction only            | 0.77             | < 0.01  | 0.15    |
| Glycine, serine and threonine metabolism    | 0.97             | 0.04    | 0.22    |
| Methane metabolism                          | 0.99             | < 0.01  | 0.26    |
| Other ion-coupled transporters              | 0.70             | 0.01    | 0.72    |
| Peptidases                                  | 0.89             | < 0.01  | 0.04    |
| Pores ion channels                          | 0.84             | 0.24    | < 0.01  |
| Protein kinases                             | 0.37             | < 0.01  | 0.03    |
| Purine metabolism                           | 0.61             | < 0.01  | 0.02    |
| Pyrimidine metabolism                       | 0.89             | < 0.01  | 0.01    |
| Pyruvate metabolism                         | 0.98             | 0.03    | 0.46    |
| Ribosome                                    | 0.84             | < 0.01  | 0.01    |
| Ribosome Biogenesis                         | 0.95             | < 0.01  | 0.06    |
| Starch and sucrose metabolism               | 0.99             | < 0.01  | 0.29    |
| Transcription factors                       | 0.99             | < 0.01  | 0.92    |
| Transcription machinery                     | 0.97             | < 0.01  | 0.03    |
| Transporters                                | 0.97             | < 0.01  | 0.14    |
| Two-component system                        | 0.015            | < 0.01  | < 0.01  |

Data were analyzed by multiple group ANOVA and Dunnett's multiple comparisons test. Results were declared significant at  $P < 0.01$ .

Table S8. Predicted Functions in HVO Diet.

Predicted functions with significant variations in hydrogenated vegetable oil diet

| Predicted functions                         | <i>P</i> - value |         |         |
|---------------------------------------------|------------------|---------|---------|
|                                             | 21 days          | 42 days | 63 days |
| ABC transporters                            | 0.44             | < 0.01  | 0.22    |
| Alanine, aspartate and glutamate metabolism | 0.09             | 0.02    | 0.06    |
| Amino acid related enzymes                  | < 0.01           | < 0.01  | < 0.01  |
| Amino sugar and nucleotide sugar metabolism | 0.02             | < 0.01  | 0.01    |
| Aminoacyl-tRNA biosynthesis                 | 0.09             | 0.01    | 0.05    |
| Arginine and proline metabolism             | 0.19             | 0.03    | 0.13    |
| Chaperones and folding catalysts            | 0.05             | 0.02    | 0.03    |
| Chromosome                                  | 0.040            | < 0.01  | 0.02    |
| DNA repair and recombination proteins       | < 0.01           | < 0.01  | < 0.01  |
| DNA replication proteins                    | 0.22             | 0.05    | 0.12    |
| General function prediction only            | 0.04             | < 0.01  | 0.01    |
| Methane metabolism                          | 0.17             | 0.022   | 0.12    |
| Other ion-coupled transporters              | 0.17             | 0.02    | 0.09    |
| Peptidases                                  | < 0.01           | < 0.01  | < 0.01  |
| Pores ion channels                          | < 0.01           | 0.02    | < 0.01  |
| Protein kinases                             | 0.03             | < 0.01  | 0.01    |
| Purine metabolism                           | < 0.01           | < 0.01  | < 0.01  |
| Pyrimidine metabolism                       | < 0.01           | < 0.01  | < 0.01  |
| Ribosome                                    | < 0.01           | < 0.01  | < 0.01  |
| Ribosome Biogenesis                         | < 0.01           | < 0.01  | < 0.01  |
| Starch and sucrose metabolism               | 0.02             | < 0.01  | 0.01    |
| Transcription factors                       | 0.18             | < 0.01  | 0.19    |
| Transcription machinery                     | 0.02             | 0.01    | 0.01    |
| Transporters                                | < 0.01           | < 0.01  | < 0.01  |
| Two-component system                        | < 0.01           | < 0.01  | < 0.01  |

Data were analyzed by multiple group ANOVA and Dunnett's multiple comparisons test. Results were declared significant at  $P < 0.01$ .

Table S9. KEGG classification of functional gene categories

| Level 1                              | Level 2                          | Level 3                                     | Database |
|--------------------------------------|----------------------------------|---------------------------------------------|----------|
| Environmental Information Processing | Membrane transport               | ABC transporters                            | PATHWAY  |
|                                      | Signal transduction              | Two-component system                        | PATHWAY  |
| Genetic Information Processing       | Translation                      | Aminoacyl-tRNA biosynthesis                 | PATHWAY  |
|                                      |                                  | Ribosome                                    | PATHWAY  |
|                                      | Transcription                    | Transcription factors                       | PATHWAY  |
| Metabolism                           | Amino Acid Metabolism            | Alanine, aspartate and glutamate metabolism | PATHWAY  |
|                                      |                                  | Glycine, serine and threonine metabolism    | PATHWAY  |
|                                      | Carbohydrate Metabolism          | Arginine and proline metabolism             | PATHWAY  |
|                                      |                                  | Amino sugar and nucleotide sugar metabolism | PATHWAY  |
|                                      |                                  | Pyruvate metabolism                         | PATHWAY  |
|                                      |                                  | Starch and sucrose metabolism               | PATHWAY  |
|                                      | Energy Metabolism                | Carbon fixation pathways in prokaryotes     | PATHWAY  |
|                                      |                                  | Methane metabolism                          | PATHWAY  |
|                                      | Nucleotide Metabolism            | Purine metabolism                           | PATHWAY  |
|                                      |                                  | Pyrimidine metabolism                       | PATHWAY  |
| Genes and proteins                   | Genetic Information Processing   | DNA repair and recombination proteins       | BRITE    |
|                                      |                                  | Chaperones and folding catalysts            | BRITE    |
|                                      |                                  | Chromosome                                  | BRITE    |
|                                      |                                  | Ribosome Biogenesis                         | BRITE    |
|                                      |                                  | Transcription machinery                     | BRITE    |
|                                      |                                  | DNA replication proteins                    | BRITE    |
|                                      | Signaling and Cellular Processes | Transporters                                | BRITE    |
|                                      |                                  | Bacterial motility proteins                 | BRITE    |
|                                      | Metabolism                       | Protein kinases                             | BRITE    |
|                                      |                                  | Amino acid related enzymes                  | BRITE    |
|                                      |                                  | Peptidases                                  | BRITE    |
| Unclassified                         | Cellular Processes and Signaling | Pores ion channels                          | BRITE    |
|                                      |                                  | Other ion-coupled transporters              | BRITE    |
|                                      | Poorly Characterized             | General function prediction only            | BRITE    |
